# Supplementary material for: Dietary Patterns Associated with Diabetes in an Older Population from Southern Italy Using an Unsupervised Learning Approach
Source: MDPI journal article supplement (doi:10.3390/s22062193), 2022-03-11
Supplement: s1 [file s1]

# Dietary Patterns Associated with Diabetes in an Older Population from Southern Italy Using an Unsupervised Learning Approach

Rossella Tatoli <sup>1</sup>, Luisa Lampignano <sup>1,\*</sup>, Iliaria Bortone <sup>1,\*</sup>, Rossella Donghia <sup>1</sup>, Fabio Castellana <sup>1</sup>, Roberta Zupo <sup>1</sup>, Sarah Tirelli <sup>1</sup>, Sara De Nucci <sup>1</sup>, Annamaria Sila <sup>1</sup>, Annalidia Natuzzi <sup>1</sup>, Madia Lozupone <sup>2</sup>, Chiara Griseta <sup>1</sup>, Sabrina Sciarra <sup>1</sup>, Simona Aresta <sup>1</sup>, Giovanni De Pergola <sup>3</sup>, Paolo Sorino <sup>4</sup>, Domenico Lofu <sup>4</sup>, Francesco Panza <sup>2</sup>, Tommaso Di Noia <sup>4</sup> and Rodolfo Sardone <sup>1</sup>

- <sup>1</sup> Unit of Data Sciences and Technology Innovation for Population Health, National Institute of Gastroenterology “Saverio de Bellis”, Research Hospital, 70013 Bari, Italy; rossella.tatoli@irccsdebellis.it (R.T.); rossydonghia@irccsdebellis.it (R.D.); fabio.castellana@irccsdebellis.it (F.C.); zuporoberta@gmail.com (R.Z.); sarah.tirelli@irccsdebellis.it (S.T.); sara.denucci@irccsdebellis.it (S.D.N.); annamaria.sila@irccsdebellis.it (A.S.); annalidia.natuzzi@irccsdebellis.it (A.N.); chiara.griseta@irccsdebellis.it (C.G.); sabrinasciarra@hotmail.it (S.S.); arestasimo@gmail.com (S.A.); rodolfo.sardone@irccsdebellis.it (R.S.)
- <sup>2</sup> Neurodegenerative Disease Unit, Department of Basic Medicine, Neuroscience, and Sense Organs, University of Bari Aldo Moro, 11, 70125 Bari, Italy; madia.lozupone@gmail.com (M.L.); f\_panza@hotmail.com (F.P.)
- <sup>3</sup> Unit of Geriatrics and Internal Medicine, National Institute of Gastroenterology “Saverio de Bellis”, Research Hospital, 70013 Bari, Italy; gdepergola@libero.it
- <sup>4</sup> Department of Electrical and Information Engineering, Polytechnic of Bari, 70125 Bari, Italy; paolo.sorino@irccsdebellis.it (P.S.); domenico.lofu@poliba.it (D.L.); tommaso.dinoia@poliba.it (T.D.N.)
- \* Correspondence: luisa.lampignano@irccsdebellis.it (L.L.); ilariabortone@gmail.com (I.B.)

**Table S1.** Concordance of the single foods in the questionnaire and the food grouping used in the analyses.

| Final Food Groups |                     | Single Foods from Questionnaire                                                                                                                                                                                                                                                                                                                                                                                                                  |
|-------------------|---------------------|--------------------------------------------------------------------------------------------------------------------------------------------------------------------------------------------------------------------------------------------------------------------------------------------------------------------------------------------------------------------------------------------------------------------------------------------------|
| 1                 | DAIRY               | Latte intero ( <i>whole-fat milk</i> ), Scamorza-Caciottina fresca-Stracchino-Fontina (semi-seasoned italian cheese), Bel Paese-Gorgonzola (italian blue cheese), Provolone-Caciocavallo (seasoned italian cheese), Grana-Parmigiano, Svizzero ( <i>swiss cheese</i> ), Pecorino-Vacchino ( <i>goat cheese, cow cheese</i> ), Formaggino, ( <i>cheese spread</i> ), Mozzarella ( <i>mozzarella cheese</i> ), Gelato ( <i>ice cream</i> ), Yogurt |
| 2                 | LOW FAT DAIRY       | Latte scremato–parzialmente scremato ( <i>skimmed and semi-skimmed milk</i> ), Ricotta ( <i>cottage cheese</i> )                                                                                                                                                                                                                                                                                                                                 |
| 3                 | EGGS                | Uova ( <i>eggs</i> )                                                                                                                                                                                                                                                                                                                                                                                                                             |
| 4                 | WHITE MEAT          | Pollo ( <i>chicken</i> ), Coniglio ( <i>rabbit</i> )                                                                                                                                                                                                                                                                                                                                                                                             |
| 5                 | RED MEAT            | Vitello ( <i>veal</i> ), Cavallo ( <i>horse</i> ), Maiale ( <i>Pork</i> ), Fegato ( <i>liver</i> ), Agnello ( <i>lamb</i> )                                                                                                                                                                                                                                                                                                                      |
| 6                 | PROCESSED MEAT      | Salsiccia fresca ( <i>fresh sausages</i> ), Prosciutto crudo ( <i>raw ham</i> ), Mortadella (a typical italian cured meat), Prosciutto cotto ( <i>ham</i> ), Salame ( <i>salami</i> )                                                                                                                                                                                                                                                            |
| 7                 | FISH                | Sogliola-Orata-Dentice-Spigola-Cernia ( <i>sole, sea bream, snapper, sea bass, grouper</i> ), Merluzzo-Razza-Palombo ( <i>codfish, stingray, dogfish</i> ), Triglia-Cefalo-Sgombro ( <i>goatfish, mullet, mackerel</i> ), Acciughe-Sarde ( <i>anchovies, sardines</i> ), Tonno sott’olio ( <i>tuna in oil</i> )                                                                                                                                  |
| 8                 | SEAFOOD/SHELLFISH   | Polpo-Seppie-Calamari-Gamberi ( <i>octopus, cuttlefish, squid, prawns</i> ), Cozze-Altri frutti di mare ( <i>mussels, other seafoods</i> )                                                                                                                                                                                                                                                                                                       |
| 9                 | LEAFY VEGETABLES    | Spinaci ( <i>spinach</i> ), Bietole-Cicorie ( <i>chard, chicory</i> ), Insalata ( <i>salad</i> )                                                                                                                                                                                                                                                                                                                                                 |
| 10                | FRUITING VEGETABLES | Pomodori ( <i>tomatoes</i> ), Zucchine-Melanzane ( <i>zucchini, eggplants</i> ), Peperoni ( <i>peppers</i> ), Carciofi ( <i>artichokes</i> ) Cetrioli-cocomeri ( <i>cucumbers</i> )                                                                                                                                                                                                                                                              |

|    |                          |                                                                                                                                                                                                                                                                                                                                                                                                                                                                                                                                                               |
|----|--------------------------|---------------------------------------------------------------------------------------------------------------------------------------------------------------------------------------------------------------------------------------------------------------------------------------------------------------------------------------------------------------------------------------------------------------------------------------------------------------------------------------------------------------------------------------------------------------|
| 11 | ROOT VEGETABLES          | Carote ( <i>carrots</i> )                                                                                                                                                                                                                                                                                                                                                                                                                                                                                                                                     |
| 12 | OTHER VEGETABLES         | Minestrone ( <i>vegetable soup</i> ), Cavoli–Cavolfiori–Cime di Rape–Rape ( <i>cabbage, cauliflower, broccoli, green turnips</i> ), Finocchi–Sedano ( <i>fennels, celery</i> )                                                                                                                                                                                                                                                                                                                                                                                |
| 13 | LEGUMES                  | Ceci - Lenticchie–Fagioli ( <i>chickpeas, lentils, beans</i> ), Piselli ( <i>peas</i> ), Fagiolini ( <i>green beans</i> ), Fave con Verdura ( <i>broad beans with vegetables</i> )                                                                                                                                                                                                                                                                                                                                                                            |
| 14 | POTATOES                 | Patate ( <i>potatoes</i> )                                                                                                                                                                                                                                                                                                                                                                                                                                                                                                                                    |
| 15 | FRUITS                   | Arance–Mandarini–Pompelmi ( <i>oranges, tangerines, grapefruits</i> ), Pesche ( <i>peaches</i> ), Fichi ( <i>figs</i> ), Albicocche ( <i>apricots</i> ), Uva ( <i>grapes</i> ), Anguria ( <i>watermelon</i> ), Melone giallo ( <i>melon</i> ), Mele–Pere ( <i>apples, pears</i> ), Kiwi, Ciliege ( <i>cherries</i> ), Banane                                                                                                                                                                                                                                  |
| 16 | NUTS                     | Frutta secca ( <i>nuts</i> )                                                                                                                                                                                                                                                                                                                                                                                                                                                                                                                                  |
| 17 | GRAINS                   | Pane ( <i>bread</i> ), Pasta asciutta ( <i>pasta</i> ), Riso o risotti ( <i>rice or risotti</i> ), Pastina o riso in brodo ( <i>pasta or rice in broth</i> )                                                                                                                                                                                                                                                                                                                                                                                                  |
| 18 | OLIVES AND VEGETABLE OIL | Olive da tavola ( <i>olives</i> ), Olio di oliva ( <i>olive oil</i> )                                                                                                                                                                                                                                                                                                                                                                                                                                                                                         |
| 19 | COOKING EDIBLE FATS      | Olio di semi ( <i>seed oil</i> ), Olio di oliva per frittura ( <i>olive oil for frying</i> ), Olio di semi per frittura ( <i>seeds oil for frying</i> ), Olio di oliva per cucinare ( <i>olive oil for cooking</i> ), Olio di semi per cucinare ( <i>seeds oil for cooking</i> ), Burro ( <i>butter</i> ), Margarina ( <i>margarine</i> ), Burro per frittura ( <i>butter for frying</i> ), Margarina per frittura ( <i>margarine for frying</i> ), Burro per cucinare ( <i>butter for cooking</i> ), Margarina per cucinare ( <i>margarine for cooking</i> ) |
| 20 | SWEETS                   | Caramelle ( <i>sweets</i> ), Cioccolata ( <i>chocolate</i> ), Pasticceria ( <i>pastries</i> ), Biscotti–Paste secche ( <i>cookies, biscuits</i> )                                                                                                                                                                                                                                                                                                                                                                                                             |
| 21 | SUGARY                   | Zucchero ( <i>sugar</i> ), Frutta sciroppata ( <i>fruit in syrup</i> )                                                                                                                                                                                                                                                                                                                                                                                                                                                                                        |
| 22 | JUICES                   | Succhi di frutta ( <i>fruit juice</i> )                                                                                                                                                                                                                                                                                                                                                                                                                                                                                                                       |
| 23 | CALORIC DRINKS           | Coca Cola–Aranciata–Chinotto ( <i>coke, orange juice, chinotto</i> )                                                                                                                                                                                                                                                                                                                                                                                                                                                                                          |
| 24 | READY TO EAT DISH        | Pizza, Focaccia (a typical Apulian bakery product)                                                                                                                                                                                                                                                                                                                                                                                                                                                                                                            |
| 25 | COFFEE                   | Caffè ( <i>coffee</i> ), Caffè d'orzo ( <i>barley coffee</i> )                                                                                                                                                                                                                                                                                                                                                                                                                                                                                                |
| 26 | WINE                     | Vino ( <i>wine</i> )                                                                                                                                                                                                                                                                                                                                                                                                                                                                                                                                          |
| 27 | BEER                     | Birra ( <i>beer</i> )                                                                                                                                                                                                                                                                                                                                                                                                                                                                                                                                         |
| 28 | SPIRITS                  | Liquore ( <i>liquor</i> )                                                                                                                                                                                                                                                                                                                                                                                                                                                                                                                                     |
| 29 | WATER                    | Acqua ( <i>water</i> )                                                                                                                                                                                                                                                                                                                                                                                                                                                                                                                                        |
